# Supplementary material for: Metronidazole Treatment Failure and Persistent BV Lead to Increased Frequencies of Activated T- and Dendritic-Cell Subsets
Source: MDPI journal article supplement (doi:10.3390/microorganisms11112643), 2023-10-27
Supplement: s1 [file s1]

Supplementary Table S1. Frequency distribution of T and dendritic cell subsets in women who had genital inflammation

| Cell Phenotype      | Univariable         |       |        |       |         |        | Multivariable (adjusted for age and time in study) |       |        |       |             |        |
|---------------------|---------------------|-------|--------|-------|---------|--------|----------------------------------------------------|-------|--------|-------|-------------|--------|
|                     | 95% CI              |       |        |       |         |        | 95% CI                                             |       |        |       |             |        |
|                     | $\beta$ coefficient | SE    | Lower  | upper | P-value | FDR    | Adj $\beta$ coefficient                            | SE    | Lower  | Upper | Adj P-value | FDR    |
| CD4+ T cells        | 0.008               | 0.026 | -0.048 | 0.064 | 0.774   | 0.8716 | 0.013                                              | 0.028 | -0.048 | 0.074 | 0.652       | 0.8424 |
| CD38+ CD4+ T cells  | 0.052               | 0.034 | -0.021 | 0.124 | 0.147   | 0.666  | 0.044                                              | 0.036 | -0.035 | 0.123 | 0.25        | 0.765  |
| HLADR+ CD4+ T cells | 0.017               | 0.032 | -0.052 | 0.087 | 0.597   | 0.8716 | 0.005                                              | 0.035 | -0.072 | 0.082 | 0.884       | 0.945  |
| CCR5+ CD4+ T cells  | -0.03               | 0.028 | -0.09  | 0.031 | 0.313   | 0.666  | -0.037                                             | 0.031 | -0.104 | 0.03  | 0.255       | 0.765  |
| CCR6+ CD4+ T cells  | -0.03               | 0.029 | -0.091 | 0.032 | 0.321   | 0.666  | -0.032                                             | 0.031 | -0.099 | 0.035 | 0.321       | 0.7704 |
| CD14- HLADR+        | -0.009              | 0.035 | -0.085 | 0.067 | 0.799   | 0.8716 | 0.018                                              | 0.034 | -0.056 | 0.091 | 0.608       | 0.8424 |
| HLADR++ CD14+       | 0.007               | 0.053 | -0.108 | 0.122 | 0.901   | 0.901  | 0.022                                              | 0.055 | -0.099 | 0.143 | 0.702       | 0.8424 |
| CD86+ HLADR++ CD14+ | -0.033              | 0.026 | -0.09  | 0.025 | 0.241   | 0.666  | -0.022                                             | 0.028 | -0.083 | 0.039 | 0.451       | 0.7971 |
| HLADR+ CD14- CD11c+ | 0.057               | 0.057 | -0.065 | 0.179 | 0.333   | 0.666  | 0.126                                              | 0.057 | 0.002  | 0.249 | 0.046       | 0.276  |
| CD86+ CD11c+        | 0.016               | 0.043 | -0.077 | 0.109 | 0.719   | 0.8716 | 0.035                                              | 0.046 | -0.066 | 0.135 | 0.465       | 0.7971 |
| HLADR+ CD14- CD123+ | -0.101              | 0.05  | -0.209 | 0.006 | 0.063   | 0.666  | -0.149                                             | 0.05  | -0.259 | -0.04 | 0.012       | 0.144  |
| CD86+ CD123+        | 0.012               | 0.029 | -0.054 | 0.079 | 0.684   | 0.8716 | -0.002                                             | 0.034 | -0.086 | 0.081 | 0.945       | 0.945  |
