# Supplementary material for: Metronidazole Treatment Failure and Persistent BV Lead to Increased Frequencies of Activated T- and Dendritic-Cell Subsets
Source: MDPI journal article supplement (doi:10.3390/microorganisms11112643), 2023-10-27
Supplement: s1 [file s1]

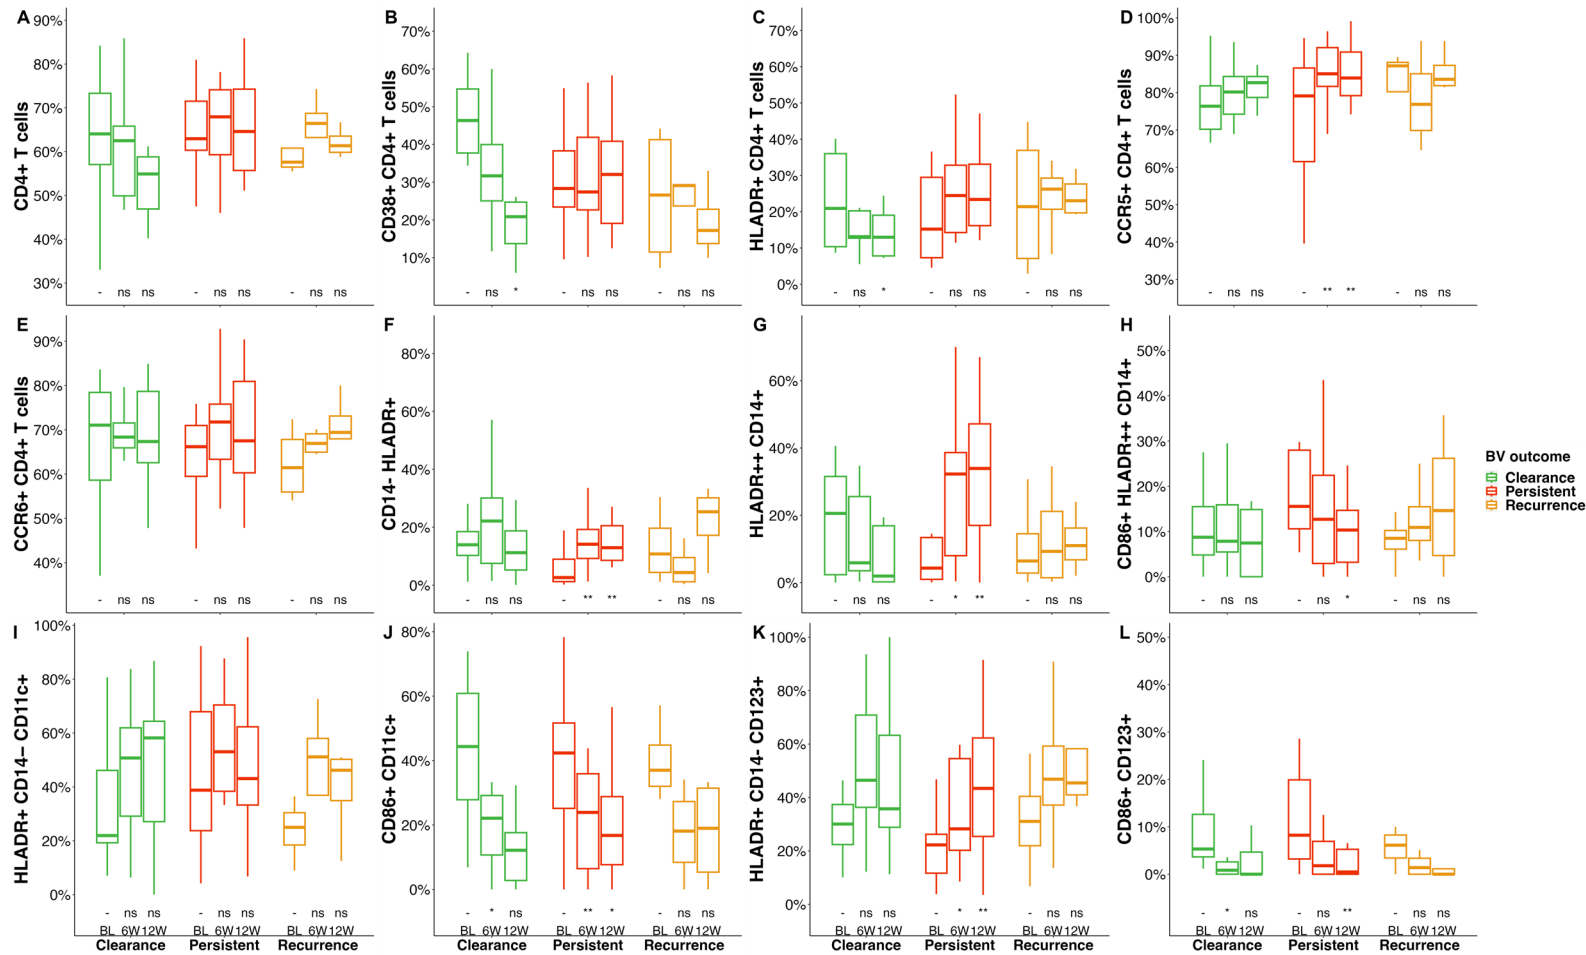

**Supplementary Figure S1.** Comparison of baseline cellular percentages to the preceding weeks within BV outcomes (clearance in green; persistence in red and recurrence in orange). Graph shows the differences over time for the frequencies of cervical (A) CD4+ T cells, (B) CD38+ CD4+ T cells, (C) HLADR+ CD4+ T cells, (D) CCR5+ CD4+ T cells, (E) CCR6+ CD4+ T cells, (F) CD14- HLADR+, (G) HLADR++ CD14+, (H) CD86+ HLADR++ CD14+, (I) HLADR+ CD14- CD11c+, (J) CD86+ CD11c+, (K) HLADR+ CD14- CD123+, and (L) CD86+ CD123+. Clearance is depicted in green, persistent in red, and recurrence in orange. \* Indicates significant differences of  $p < 0.05$ , \*\* indicates significant differences  $p < 0.01$  and *ns* indicates non-significant difference ( $p > 0.05$ ).
